# Supplementary material for: Functional network motifs defined through integration of protein-protein and genetic interactions
Source: PubMed Central journal article supplement (PMC8877332; doi:10.7717/peerj.13016), 2022-02-22

A

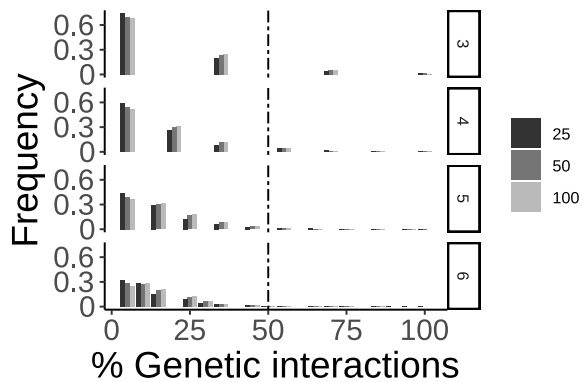

B

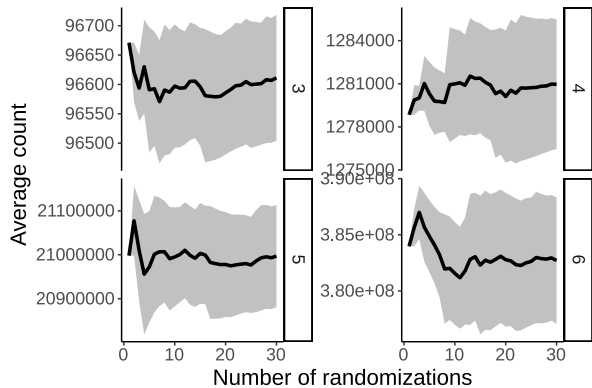

C

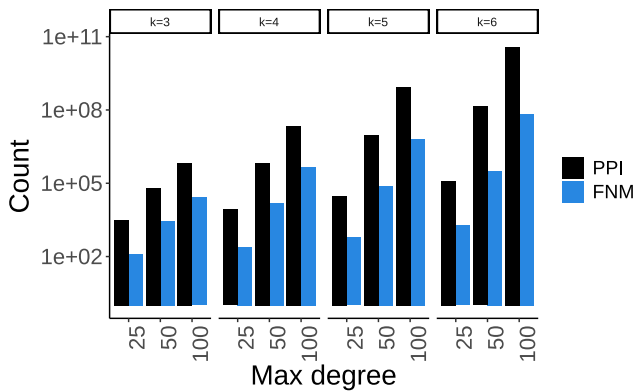

D

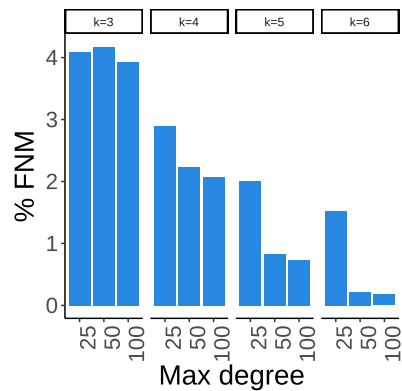

Supplement: peerj-10-13016-s001.pdf [file peerj-10-13016-s001.pdf]
